1  
2  
3  
4 **UNDERLYING PRESSURES THAT BLACK MOTHERS AND**  
5 **THEIR CHILDREN FACE: A QUALITATIVE ASSESSMENT ON**  
6 **THE EFFECTS OF RACISM/DISCRIMINATION AND THE**  
7 **COVID 19 PANDEMIC**

8  
9  
10  
11 **Denisia N. Thomas, MS<sup>1</sup>; Ashley Rizzieri, MPH<sup>1</sup>**  
12 **Dr. Mayra Rodriguez, Ph.D., M.P.H.<sup>2</sup>**

- 13  
14 1. Medical Student, Edward Via College of Osteopathic Medicine, Auburn, Alabama,  
15 United States  
16 2. Discipline Chair for Epidemiology, Community and Public Health, and Preventive  
17 Medicine, Edward Via College of Osteopathic Medicine, Auburn, Alabama, United  
18 States

19  
20  
21 \*Corresponding author: Denisia Thomas  
22 [thomasdenisia@yahoo.com](mailto:thomasdenisia@yahoo.com)

23  
24  
25 **ACKNOWLEDGEMENTS**

26  
27 We would like to extend a special thank you to the following people that helped who participated in the development and execution of this  
28 project.

- 29  
30 1. David Stephen, DO: Assistance with the quantitative arm of this study.  
31 2. Theresa McCann, PhD, MPH: Development of surveys  
32 3. Ann W. Lambert DNP, MSN, PPCNP-BC: Assistance with the quantitative arm of this study  
33 4. Heidi Kleuss, PhD, MS: Kinesiology for the quantitative arm of this study  
34 5. Rian Anglin, MD: Pediatric consultant  
35 6. Mary Ann Taylor, PhD, MS: Psychological counseling  
36 7. Leondria Hinds, DO: Survey transcribing  
37 8. Shannon Hart, DO: Survey transcribing  
38 9. Crystal Smith, MS: Survey transcribing  
39 10. Jesse Hunt: Survey transcribing  
40 11. Stephanie Kyeremeh: Data collection  
41 12. Fernando Alvarez: Data collection  
42 13. Tori Knapp: Data collection  
43 14. Genevieve Thompson: Data collection  
44 15. Madeleine Schultz: Data collection

45 **ABSTRACT:**

46

47 **Background:** Poverty, racism, discrimination, inadequate access to healthcare, and personal,  
48 everyday stressors lead to poor health outcomes, especially in African American families in the  
49 south. There is limited data on how these stressors are absorbed between the mother and child  
50 dyad.

51 **Objective:** To assess the effects of racism, everyday stressors (i.e. motherhood), and the COVID  
52 pandemic on African American/Black mothers and their children.

53 **Methods:** Utilizing the Health Belief Model, a survey was developed to assess mother-child  
54 stressors relating to three different constructs: racism/discrimination, pandemic/covid-19, and  
55 parenting. We interviewed seven black mothers and their children (aged 4-10yo). The families  
56 were recruited from a pediatric office in the rural city of Alexander City, Alabama. Interviews  
57 took place in an intimate setting and lasted for 1.5-2 hours. Medical students conducted,  
58 recorded, and transcribed each interview. The interview assessed the association between the  
59 COVID-19 pandemic, personal traumatic events, and racism and discrimination in their everyday  
60 lives.

61 **Results:** Through qualitative analysis; racism, daily activities, and the COVID-19 pandemic  
62 were demonstrated to be significant stressors for the mothers. Knowledge, school/work, actions,  
63 emotions, and seriousness/susceptibility displayed stressors not only in the mom as one would  
64 expect, but in the children as well. Using the resilience model, we assessed adversity, coping  
65 strategies, and self-efficacy. As one might expect, each situation caused a different level of  
66 anxiety; however, the coping strategies varied. Some moms took to smoking to cope with it  
67 while others chose suppression. The children's coping ranged from inconsolable crying and  
68 using outlets such as phones to cope.

69 **Conclusion:** Ultimately, our qualitative approach saw an association between the pandemic and  
70 discrimination. Mothers often felt the need to shield children from the emotions attached to  
71 discrimination, and ultimately were unable to. There is a need to explore resilience and assess  
72 these stressors and changes in perception over time.

73

74

75

76

**INTRODUCTION**

77

78 Witnessing the Black Lives Matter protests and the unproportionable deaths of African  
79 Americans due to the COVID-19 pandemic drove the inspiration for this study. Poverty, racism,  
80 discrimination, inadequate access to healthcare, and personal, everyday stressors such as  
81 parenting lead to poor health outcomes, especially in African American families in the south.  
82 In the southern United States, influences of environmental stressors, such as poverty, racism,  
83 lack of medical care access, and personal stressors such as parenting or mental health, decrease  
84 the health outcomes in families [1-5]. In 2020, the COVID pandemic hit and disproportionately  
85 affected black families, killing more black Americans than their respective population

86 proportional [9]. Along with the COVID pandemic, racism, and discrimination took center stage  
87 leaving Black/African Americans in the center of the storm. Black families all over the country  
88 expressed their anger, fear, and sadness with the current state of racism in America. The  
89 pandemic and current racism in America place a huge burden of stress on black families and  
90 their loved ones, adding to the already heavy load of stressors families face in underserved  
91 Alabama. Currently, there is limited data on how these accumulated stressors affect the Black  
92 mother and child relationship. This study aims to investigate the effects of the COVID-19  
93 pandemic and racism on black mothers and their young children using in-depth interviews.

94

95

## METHODS

96

97 We used a semi-structured in-depth interview approach to gather data from seven Black/African  
98 American families from pediatric clinics in Alexander City.

99 One-on-one interviews were conducted in an intimate setting with the mothers and children,  
100 separately. The in-depth interviews addressed three different stressors, racism/discrimination,  
101 covid-19 pandemic, and parenting. Each of these stressors was assessed using the Health Belief  
102 Model as a framework with the following constructs: knowledge, school/work, action, emotions,  
103 and seriousness/susceptibility. Each of the questions were open-ended and trained staff were  
104 asked to allow time for a response. Interviewers were encouraged to ask, “tell me more” when  
105 there were opportunities to do so. Although we asked questions about covid-19 and the vaccine,  
106 interviewers avoided using jargon language. Interviewers were trained to be active listeners and  
107 treat their participants with respect. In the event a participant became upset, the interviewers  
108 were trained to allow time for the participant to take a moment to collect themselves or  
109 discontinue the interview. While the mothers were being interviewed, the children were in the  
110 room either interviewing with another staff member or playing/coloring waiting their turn to be  
111 interviewed.

112

113 Second-year nursing and medical students were trained in delivering the semi-structured in-depth  
114 interviews for mom and child. The semi-structured approach was beneficial when working with  
115 small children as it was difficult to maintain their attention during the interview. Interviews  
116 lasted approximately 1.5 hours per family. Data was recorded and transcribed by trained medical  
117 students. After transcription, the team met to discuss each of the transcript files where inaudible  
118 data was discussed to determine the accuracy of the file.

119

120

121

122

123

124

125

## 126 RESULTS

### 127 **Pandemic:**

#### 128 129 *Knowledge*

130 Almost all mothers know that Covid is a virus and could be prevented from standing six feet  
131 apart and wearing a mask as per CDC guidelines. Some mothers were able to expand on this  
132 stating that symptoms of the virus were “comparable to the common cold” and “extreme cases  
133 could lead to pneumonia”. All children knew about Covid-19 from either their parents or through  
134 television, but only some were able to explain how it was spread via “not wearing a mask” or  
135 “not standing six feet apart”. All children could explain that germs in general were shared with a  
136 lack of hand washing and distancing. Knowledge of the vaccine varied amongst mothers and  
137 children alike. Some mothers admitted to not knowing much about the vaccine and not being  
138 vaccinated themselves. Some admitted to needing to do more research on the vaccine because  
139 their knowledge was limited to personal opinions online. One mother expressed her initial  
140 hesitations about the vaccine and how she thought “it was gonna kill us”. Most children’s  
141 knowledge of the vaccine was limited. They heard of a vaccine either through school or  
142 alternative media outlets. Some children heard about the vaccine “hurting”.

#### 143 144 *Susceptibility/Seriousness*

145 Moms who didn’t know anyone affected by the virus were still fearful of the hospitalizations and  
146 had anxiety discussing the virus. One mom wasn’t afraid of contracting the virus until she  
147 endured it herself. Another mom said she thought people pick and choose when to be serious  
148 about covid”, explaining that although she knew everyone was vulnerable, she would be more  
149 worried if someone in her family contracted the virus. Many moms believed that their children  
150 didn’t fully grasp the severity of Covid. Many of the children didn’t know anyone personally  
151 with the virus, didn’t believe they were susceptible to getting the virus, but did agree that it  
152 would “be bad to be sick” and described it as a “10/10 of severity” if they were to get it. Many  
153 believed that other students and teachers at their school didn’t take the mask mandate or social  
154 distancing seriously.

#### 155 156 *School Work*

157 All families, except for one who attended online, participated in school in person. Although the  
158 classrooms varied among the children, completing schoolwork was not a problem. The children  
159 attending school online did admit to “things changing. Hating school because it was too much  
160 work through virtual”. All children explained how they preferred to be in person during school.  
161 Those who were online missed their friends, the gym, and recess. Those who attended in person  
162 said things like “I like seeing my friends” and “I like when we get to go on the playground”.

166 *Emotions*

167 The gravity of the pandemic varied amongst the mothers, but all could admit to a degree of  
168 anxiety surrounding the virus. Mothers admit to facing adversity, “it wiped out all my residents  
169 and my sister passed away”. They express fear of what would happen to them if they were to get  
170 Covid themselves, “I’m always scared and don’t know what would happen if we were in that  
171 predicament”. Moms are not only stressed by getting the disease but also what it means to be  
172 absent from their jobs, “I’m working part-time as it is, and I can’t afford to not be at work”.  
173 Mothers don’t think the pandemic is something their children right now have to worry about, “I  
174 am happy he doesn’t worry and he doesn’t have time to worry”.

175  
176 Children’s perceptions of the pandemic are that they are scared. Some expressed “I don’t want to  
177 get it, I just wanna stay away from people who have it. It feels nasty and yucky”. Some children  
178 are more worried about how it limits them in school and in friendships. One child admitted to  
179 feeling sad at times when she “wanted a hug from a friend but didn’t know if they had the virus”.  
180 Other children were annoyed when they had to wear their masks when it was hot outside or  
181 uncomfortable.

182

183 *Action*

184 Every mother and child admitted to wearing a mask, frequent hand washing, and social  
185 distancing. If they knew someone was in contact with the virus, then they would quarantine as  
186 per CDC guidelines.

187

188 **Racism:**

189

190 *Knowledge*

191 When asked what racism meant to mothers we received responses such as “when someone points  
192 out imperfections and singles them out for the way they are”, “hating another race of people”,  
193 and “people not wanting others to have the same status”. Many mothers have met and currently  
194 know racist people. When children were asked what they knew about racism, the responses were  
195 “when someone sees white vs. black”, “someone judges you for the way you look”, and some  
196 children didn’t know how to describe what racism was but heard about it through parents,  
197 school, or local news stations. Some children were aware of the recent protests going on in our  
198 nation surrounding racism.

199

200 *Susceptibility/Seriousness*

201 All mothers had experienced racism to some degree during their lives and believed they were  
202 generally highly susceptible to that form of discrimination. Many children deny experiencing  
203 racism within their schools, friendships, and community.

204

205

206 *Emotion*

207 Mothers and children both explained that discussing racism with friends, family, and in school  
208 made them uneasy, uncomfortable, sad, or mad. One mom explained how she faced an incidence  
209 of racism within the military and the conflict ran through her mind over again until the issue was  
210 resolved. Mothers who have experienced outward signs of racism in the past were worried that  
211 they will experience it again within their community and wanted to shelter their children from  
212 being victimized. One mom stated, “I want my child to be a child and don’t want him to worry  
213 about that”, explaining that she wants him to enjoy being a kid. Moms feel that they will have to  
214 raise their children in a particular way in the future. One mom describes how she feels raising her  
215 sons, “I have to raise them as black men, I have to teach them how to be strong and that’s hard”.  
216 She further elaborated on how she will have to instill resilience in her sons in light of current  
217 events surrounding police brutality.

218  
219 Children admit to seeing protests on TV and seeing their parent’s reactions. One child compared  
220 the protests to a scary movie. Many children had not experienced racism within their school or  
221 friend groups.

222  
223 *Action*

224 Some mothers have not outwardly had a discussion with their children about racism yet, but  
225 many have had discussions on responding to a bully. Advice given included, “walking away”,  
226 “not getting involved”, and “don’t retaliate”. Some moms educated their children through the  
227 news on TV and used it as a platform to explain how some members of society discriminate  
228 based on skin color and race. When children were asked what they would do if they experienced  
229 another being racist towards them, they all resulted in telling someone, most likely a principal of  
230 the school.

231  
232 **DISCUSSION**

233 Historically, American systems have excluded Black women from support and resources  
234 conferred on white women, an inequity exemplified by the welfare system (10). The participants  
235 agreed they were susceptible to covid, but the perceived severity of the virus varied based on  
236 individual experiences of knowing someone personally who was sick. Regardless, all  
237 participants were adherent to the mask mandate but wary of the vaccination. This can be  
238 attributed to a possible lack of knowledge of how the vaccine was made, the timing of the  
239 vaccine, and exposure to public opinions of fear and distrust in the vaccination in general. One  
240 recent study found that out of 963 Alabamians, 44.5% were unlikely or highly unlikely to get  
241 vaccinated. Furthermore, healthcare providers were the most trusted regardless of vaccination  
242 status, however those who were unlikely to be vaccinated trusted social media and their local  
243 news more (11). Covid-19 has placed undue stress on families to adjust their daily routines.  
244 Some children were forced to transition to a virtual classroom that allowed them to continue their  
245 studies but isolated them from their friends and denied them the opportunity to enjoy their

246 favorite activities at school like recess. Some mothers were worried about how they would  
247 financially support their families due to layoffs from the pandemic. According to a recent  
248 executive labor summary in Alabama, the pandemic disproportionately affected women and  
249 persons of color more (12). Through the seven families interviewed we are already seeing a clear  
250 effect that Covid has on financial and emotional stability.

251  
252 Mothers were motivated to protect their children from racism and social concerns. Many wanted  
253 them to enjoy being children and not have to worry about some of the harsh realities. It was,  
254 however, clear, that many would eventually have the discussion in the future. Even if not  
255 prompted directly by the parents, many were not hesitant to introduce concepts of racial injustice  
256 to their children through the exposure of recent events, including national protests against police  
257 brutality. Fortunately, many children interviewed denied experiencing outward signs of racism at  
258 school but had a plan for if they did, which usually involved telling an adult.

259  
260 Apart from data pending, there are a few limitations to the results that possibly inhibited us from  
261 grasping a full picture of how stress from covid/racism affects coping behavior. The small  
262 sample size of seven moms and their children limits the variety of life events experienced. Some  
263 children were subjected to virtual classrooms while others still maintained in-person lessons at  
264 school. Within the responses from participants, we noticed a difference in the amount of  
265 schoolwork, exposure to play, and exposure to friendships based on the type of learning  
266 environment children were subjected to. One could imagine that the children who were exposed  
267 to a virtual classroom didn't have the same coping mechanisms available as those attending in  
268 person.

269  
270 In addition, bias could have been introduced within data collection due to different interviewers  
271 asking questions. Not all questions could have been asked the same way for each family. Not all  
272 families could have felt open to discussing these sensitive topics with each interviewer based on  
273 comfortability. These factors would most certainly affect the quality of answers given at the  
274 time.

275  
276 There is a possibility that leading bias was introduced into the study as well due to redirecting  
277 children in each interview. The time required to complete each survey superseded the attention  
278 span of some participants. It led some interviewers to rephrase open-ended questions like, "how  
279 is your school work" to closed-ended questions like "you do well in school, right"?

280  
281 The interplay between the pandemic and racism experienced by the families will have to be  
282 further analyzed upon completion of the quantitative arm of this study to see how it affects  
283 coping behaviors. Some moms admitted to crying, their children lashing out to get what they  
284 want, and moms picking up habits like smoking when faced with chronic stress in general. The

285 qualitative arm examined in this study allows us to peek into some of the perceptions families  
286 hold but doesn't give us a complete picture.

287

288

289

### CONCLUSIONS

290 As hypothesized, mothers followed CDC precautions and taught their children to prevent  
291 contracting Covid. In addition to mothers teaching their children how to be safe, school, and  
292 social media played a role in influencing mask behavior and social distancing as well. Many  
293 children were not convinced they were susceptible to covid but agreed it would be bad if they  
294 were sick with this virus. In addition, children were bothered by the limited playtime with friends  
295 at school and sometimes inconvenienced by the mask mandate when it was hot outside.

296

297 Many of the moms had been affected by racism in their lives but had not had a discussion with  
298 their children on how it presents and what to do if they themselves experienced it. Some children  
299 had an idea of what racism was and how they would respond to someone bullying them but had  
300 not admitted to experiencing it in their daily lives at school. To truly complete the picture of how  
301 covid and racism affect both mother and child, the stress they endure, and subsequent coping  
302 mechanisms we will need to finish the quantitative arm of this study.

303

304

305

### REFERENCES

306 1. Ford CL, Airhihenbuwa CO. Critical race theory, race equity, and Public Health:

307 Toward antiracism praxis. *American Journal of Public Health*. 2010;100(S1).

308 doi:10.2105/ajph.2009.171058

309 2. Hertzman C, Boyce T. How experience gets under the skin to create gradients in

310 Developmental Health. *Annual Review of Public Health*. 2010;31(1):329-347.

311 doi:10.1146/annurev.publhealth.012809.103538

312 3. Johnson SB, Riley AW, Granger DA, Riis J. The science of early life toxic stress for

313 pediatric practice and Advocacy. *Pediatrics*. 2013;131(2):319-327.

314 doi:10.1542/peds.2012-0469



- 315 4. Lupien SJ, McEwen BS, Gunnar MR, Heim C. Effects of stress throughout the lifespan  
316 on the brain, behaviour and cognition. *Nature Reviews Neuroscience*. 2009;10(6):434-  
317 445. doi:10.1038/nrn2639
- 318 5. Paradies Y. A systematic review of empirical research on self-reported racism and  
319 health. *International Journal of Epidemiology*. 2006;35(4):888-901.  
320 doi:10.1093/ije/dyl056
- 321 6. Felitti VJ, Anda RF, Nordenberg D, et al. Relationship of childhood abuse and  
322 household dysfunction to many of the leading causes of death in adults. *American*  
323 *Journal of Preventive Medicine*. 1998;14(4):245-258. doi:10.1016/s0749-3797(98)00017-  
324 8
- 325 7. Crouch E, Probst JC, Radcliff E, Bennett KJ, McKinney SH. Prevalence of adverse  
326 childhood experiences (ACES) among us children. *Child Abuse & Neglect*. 2019;92:209-  
327 218. doi:10.1016/j.chiabu.2019.04.010
- 328 8. Mersky JP, Choi C, Plummer Lee CT, Janczewski CE. Disparities in adverse  
329 childhood experiences by race/ethnicity, gender, and economic status: Intersectional  
330 Analysis of a nationally representative sample. *Child Abuse & Neglect*.  
331 2021;117:105066. doi:10.1016/j.chiabu.2021.105066
- 332 9. Tirupathi R, Muradova V, Shekhar R, Salim SA, Al-Tawfiq JA, Palabindala V. Covid-  
333 19 disparity among racial and ethnic minorities in the US: A Cross Sectional Analysis.  
334 *Travel Medicine and Infectious Disease*. 2020;38:101904.  
335 doi:10.1016/j.tmaid.2020.101904

336 10. *The impact of institutional racism on maternal and child health*. NICHQ. (2022,  
337 February 15). Retrieved February 2, 2023, from [https://www.nichq.org/insight/impact-](https://www.nichq.org/insight/impact-institutional-racism-maternal-and-child-health)  
338 [institutional-racism-maternal-and-child-health](https://www.nichq.org/insight/impact-institutional-racism-maternal-and-child-health)

339  
340 11. Bassler, John R. MS; Redden, David T. PhD; Hall, Allyson G. PhD; Ford, Eric T.  
341 PhD, MPH; Chrapah, Sandra MSH; Erwin, Paul C. MD, DrPH. COVID-19 Vaccine  
342 Knowledge, Attitudes, and Practices in Alabama: The Case for Primary Health Care  
343 Providers. *Journal of Public Health Management and Practice* 28(6):p 631-638. doi:  
344 10.1097/PHH.0000000000001556

345  
346 12. Alabama Arise. “The State of Working Alabama 2021.” *Alabama Arise*, 22 Feb.  
347 2021, [https://www.alarise.org/resources/state-of-working-alabama-2021-executive-](https://www.alarise.org/resources/state-of-working-alabama-2021-executive-summary/)  
348 [summary/](https://www.alarise.org/resources/state-of-working-alabama-2021-executive-summary/).

349

350

351

352

353

## **Figure 1: Questionnaire**

### *Knowledge*

1. What do you know about the Coronavirus?
2. How can someone get sick?
3. What do you know about the covid-19 VACCINE?
4. Where do you usually get information about the coronavirus? (Have them list all the sources they use)
5. Discuss what information you have shared with your child (about the pandemic)
6. Do you know anyone who has been infected with the coronavirus?
7. Do you have any questions about the virus? (Refer the patient to the CDC website for

medRxiv preprint doi: <https://doi.org/10.1101/2023.02.15.23286011>; this version posted February 23, 2023. The copyright holder for this preprint (which was not certified by peer review) is the author/funder, who has granted medRxiv a license to display the preprint in perpetuity. It is made available under a [CC-BY 4.0 International license](https://creativecommons.org/licenses/by/4.0/).

### *Emotion*

1. How does it make you *feel* when you hear others (parents, friends, family) talk about the virus/germ?
2. Do you think (your child/your mom) *worries* about the virus? Why do you think he/she worries? (Give an example)
  - a. How does it make you *feel*?
3. How do you *feel* about people getting sick from the virus/germ? (Worried, scared?)
4. How does it make you *feel* when you hear people argue about the policies that have been implemented (mask-wearing, socially distanced, etc.)
5. Describe a moment when you were most worried /stressed regarding the pandemic.

### *School*

1. How (are you) is your child doing in school? (ie: *What is the best thing you like about school? What is typical like at school?*)
2. Do you (your child) attend school in person or online?
3. Discuss your efforts when involved in school homework/activities.
4. Discuss your limitations when involved in school homework/activities.
5. Describe the way in which (you) and your child get social interaction (play with friends/family)

### *Seriousness/ Susceptibility*

1. Do you think people (including yourself) are taking the precautions against the virus seriously?
2. Do you think you are vulnerable (at risk) to getting the virus?

3. How serious (severe) do you think it would be if you contract the virus? (social, and medical consequences)

### *Action*

1. What would you do if someone close to you (parents, siblings, family) were to get sick?
2. How do you protect/keep yourself (your family) safe from the virus?
3. What do you think about the COVID-19 vaccine? (Good, bad?)
4. How confident are you about wearing a mask/ getting the vaccine? Does wearing a mask keep you safe?
5. Discuss ways in which you and your child work through stress

medRxiv preprint doi: <https://doi.org/10.1101/2023.02.15.23286011>; this version posted February 23, 2023. The copyright holder for this preprint (which was not certified by peer review) is the author/funder, who has granted medRxiv a license to display the preprint in perpetuity. It is made available under a [CC-BY 4.0 International license](#).

## *Now let's talk about racism: RACISM & DISCRIMINATION STRESSORS*

### *Knowledge*

1. How do you describe/define Racism /Discrimination?
2. What have you heard on TV about bias, discrimination, and racism?
3. Do you know a racist?

### *Emotion*

1. How does it make you **feel** when you hear others (parents, friends, family) talk about racism?
2. Do you (your mom/child) worry about racism in your life?
3. Are you **worried** about racists in your community?
4. How do you feel about protests on television/community about fighting racism?

### *School/Work*

1. Have you experienced bias/discrimination/racism at school (work)?
2. Describe the most significant moment in your life in which you felt discriminated (felt excluded or less) because of the color of your skin at school/ work
  - a. Did you talk to anyone about the event?
  - b. Did you think about what happened days later?
3. Have you experienced discrimination/racism in the last 3 months?

### *Seriousness/ Susceptibility*

1. How susceptible (vulnerable) are you to bias, or discrimination based on your skin color?
2. Describe if and how discrimination/racism will affect you, your health, and your family

3. Describe conversations you have had with your child (mom) about bias, racism, and discrimination

*Action*

1. When you hear people talking about the issue of racism, what do you do?
2. Describe ways in which you protect/keep yourself safe against racists/ racism/discrimination.
3. What would you do if you ever hear anyone say a racist comment?
4. What would you do if you learned that someone close to you does or says something racist?
5. Discuss advice you have given to your child when addressing bias, racism, and discrimination (mom only)
